# Supplementary material for: A genomic catalogue of soil microbiomes boosts mining of biodiversity and genetic resources
Source: PubMed Central journal article supplement (PMC10640626; doi:10.1038/s41467-023-43000-z), 2023-11-11
Supplement: 41467_2023_43000_MOESM1_ESM.pdf [file 41467_2023_43000_MOESM1_ESM.pdf]

# **A Genomic Catalogue of Soil Microbiomes Boosts Mining of Biodiversity and Genetic Resources**

## **Supplementary Figures legends**

**Supplementary Fig. 1. Overview of the genome quality from SMAG.** **a**, The number of reconstructed MAGs at different sequencing depths (Number of clean reads). **b**, The number of reconstructed MAGs per metagenome. **c**, The completeness and genome sizes for the SGBs. **d**, The contamination and genome sizes for the SGBs. **e**, Completeness and contamination scores for the SGBs. (**c**, **d** and **e**) are all colored by their quality classification category. **f**, Distribution of the level of strain heterogeneity estimated for the species-level MAGs. from CheckM. Dashed vertical lines are the median strain heterogeneity of medium and high-quality MAGs, respectively.

**Supplementary Fig. 2. Overview of the reconstructed SGBs and taxonomic assignment.** **a**, The distribution of the number of MAGs across kSGBs and uSGBs. **b**, The relationship between SGBs and corresponding reference genomes. **c**, The genome size of kSGBs and uSGBs across phyla ( $n = 21,077$ ). **d**, Identification of relative evolutionary divergence (RED) cutoffs for phylogenetic clustering in the SMAG tree.

**Supplementary Fig. 3. Functional and intraspecies genomic annotations.** **a**, The comparison of the number of KEGG pathways between kSGBs and uSGBs. **b**, **The proportion of each COG functional category between kSGBs and uSGBs.** **c**, The length of 107 pangenomes and the number of genomes in each pangenome. Dash horizontal line is the average pangenome length. **d**, Correlations between the percentage of core genes and the number of genomes. **e**, Correlations between the percentage of core genes and the size of the genomes. **f**, The density of SNVs for kSGBs and uSGBs across the dominant phyla.

**Supplementary Fig. 4. Histogram of BGC sizes and the representative length BGCs. a,** Distribution of BGC length. The SMAG catalogue contains complex types of multigene BGCs, most of which were fragmented BGCs. **b-f,** Five NRPS clusters with a length >100kb.

**Supplementary Fig. 5. Overview of the CRISPR and Cas protein identified from the SMAG catalogue. a,** The number of spacers identified across the reconstructed MAGs. **b,** The comparison of identified spacers between uSGBs and kSGBs (n = 662 MAGs). **c,** The number of Cas proteins identified across the reconstructed MAGs (n = 563 MAGs). **d,** The Cas proteins were identified as novel and old Cas across Cas protein types.

**Supplementary Fig. 6. Quality of virus and virus-host gene ratio.** a, The quality of the viruses identified across dominant phyla. b, The distribution of the viral length. e, The overview of virus and host gene ratio was identified from the SMAG.

**Supplementary Figures**

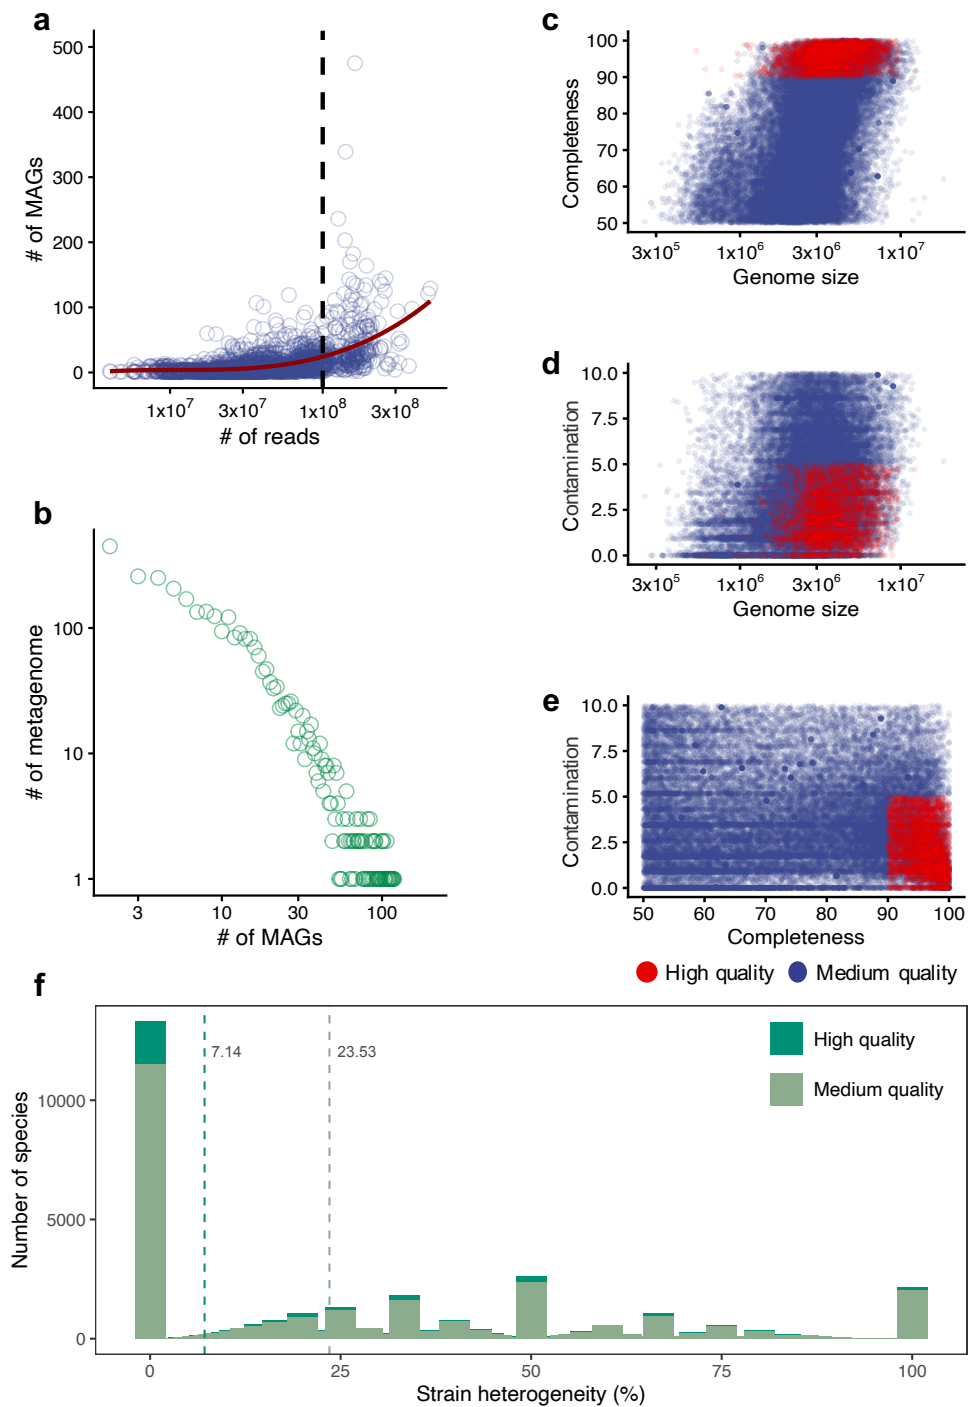

**Supplementary Fig. 1: Overview of the genome quality from SMAG.** **a**, The number of reconstructed MAGs at different sequencing depths (Number of clean reads). **b**, The number of reconstructed MAGs per metagenome. **c**, The completeness and genome sizes for the SGBs. **d**, The contamination and genome sizes for the SGBs. **e**, Completeness and contamination scores for the SGBs. (**c**, **d** and **e**) are all colored by their quality classification category. **f**, Distribution of the level of strain heterogeneity estimated for the species-level MAGs. from CheckM. Dashed vertical lines are the median strain heterogeneity of medium and high-quality MAGs, respectively.



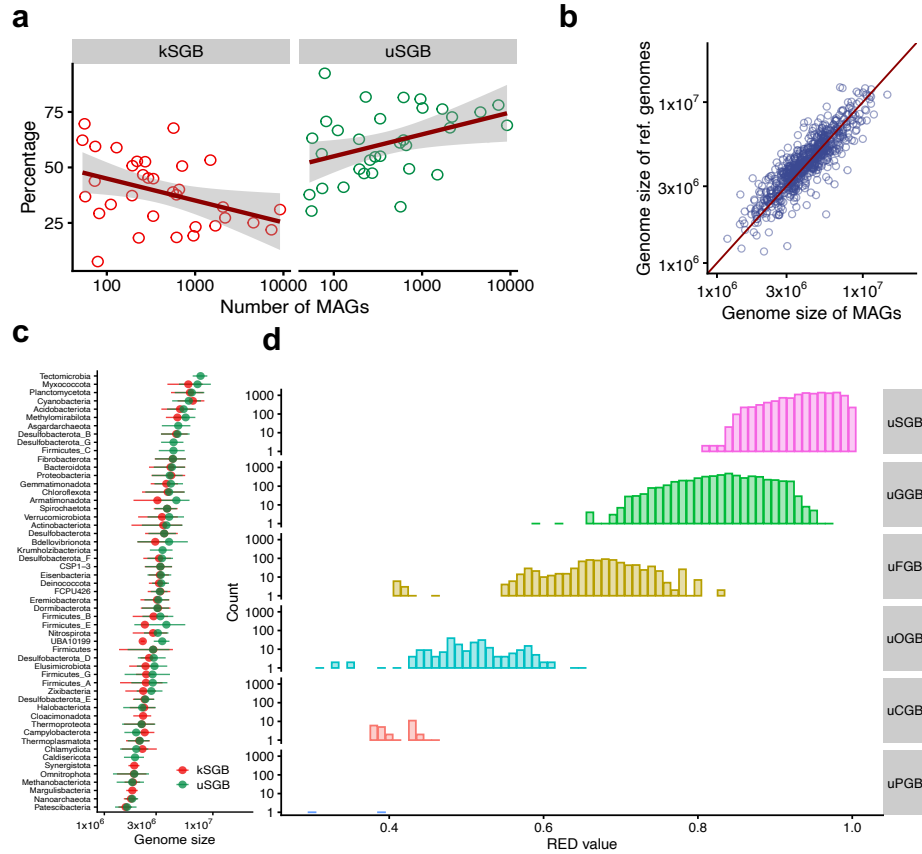

**Supplementary Fig. 2: Overview of the reconstructed SGBs and taxonomic assignment.**

**a**, The distribution of the number of MAGs across kSGBs and uSGBs. **b**, The relationship between SGBs and corresponding reference genomes. **c**, The genome size of kSGBs and uSGBs across phyla ( $n = 21,077$ ). **d**, Identification of relative evolutionary divergence (RED) cutoffs for phylogenetic clustering in the SMAG tree.

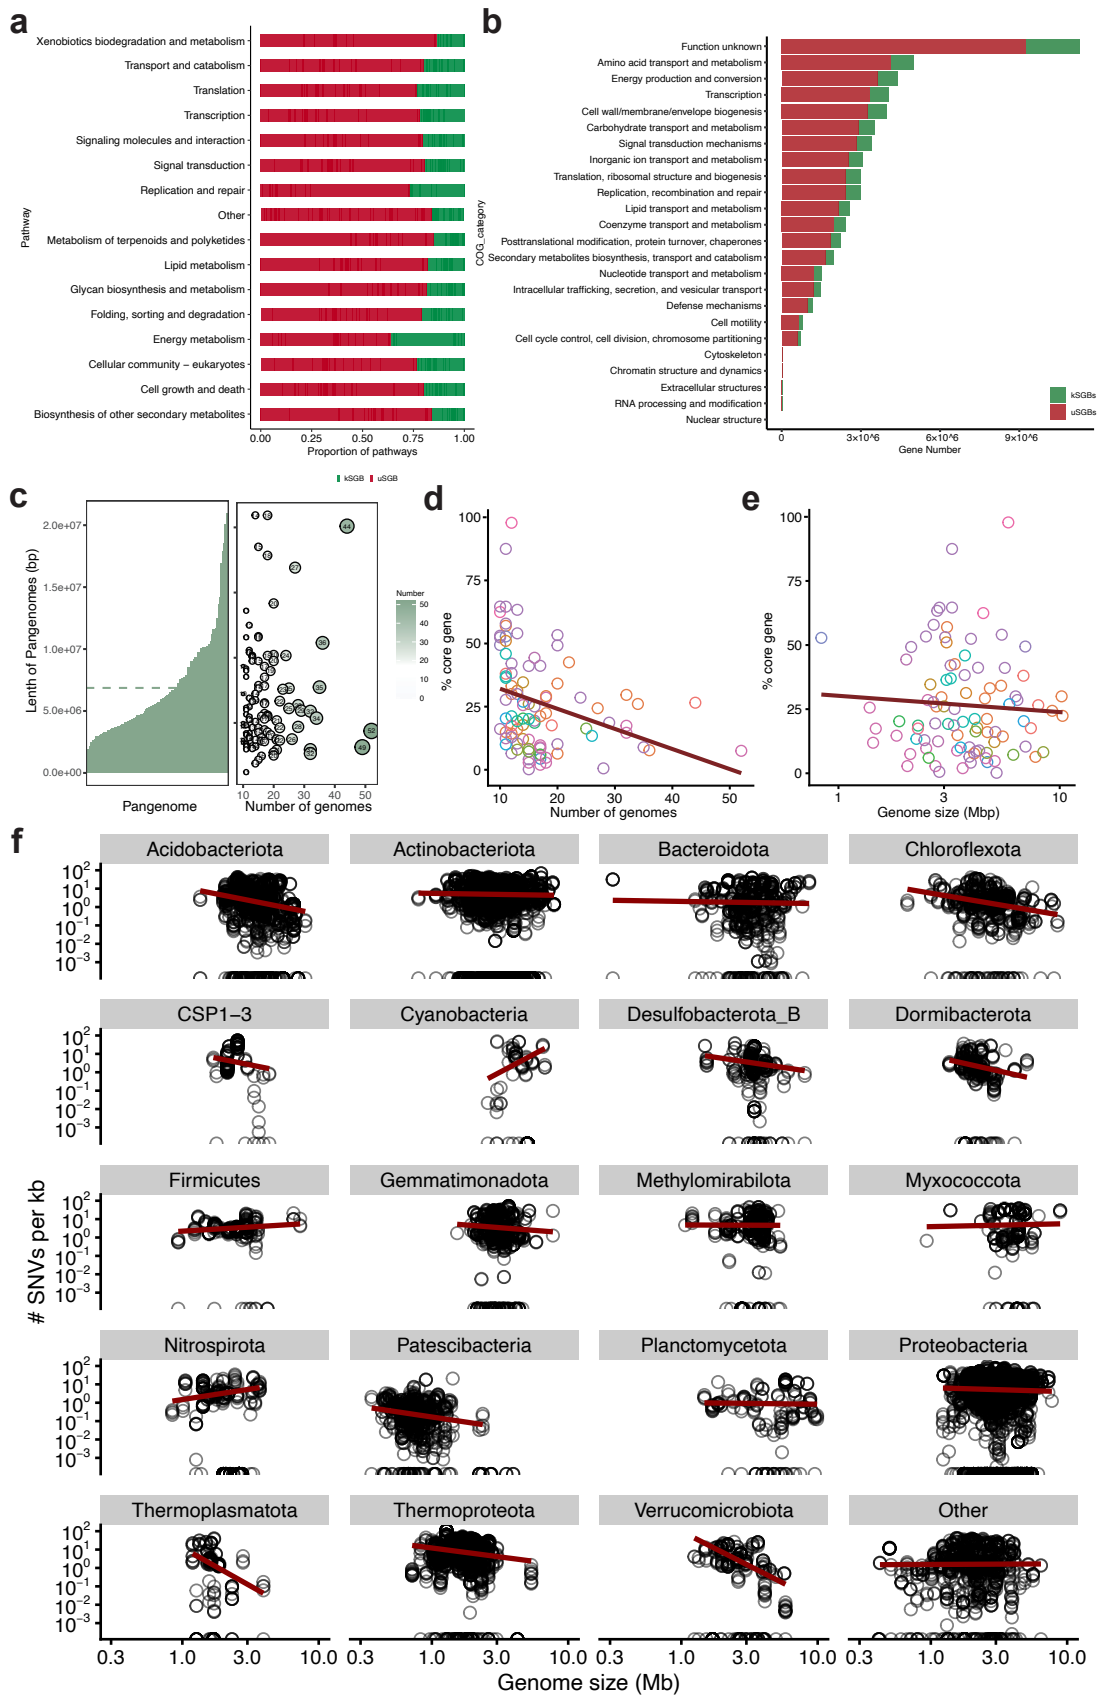

**Supplementary Fig. 3: Functional and intraspecies genomic annotations. a, The comparison of the number of KEGG pathways between kSGBs and uSGBs. b, The proportion**

**of each COG functional category between kSGBs and uSGBs. c,** The length of 107 pangenomes and the number of genomes in each pangenome. Dash horizontal line is the average pangenome length. **d,** Correlations between the percentage of core genes and the number of genomes. **e,** Correlations between the percentage of core genes and the size of the genomes. **f,** The density of SNVs for kSGBs and uSGBs across the dominant phyla.

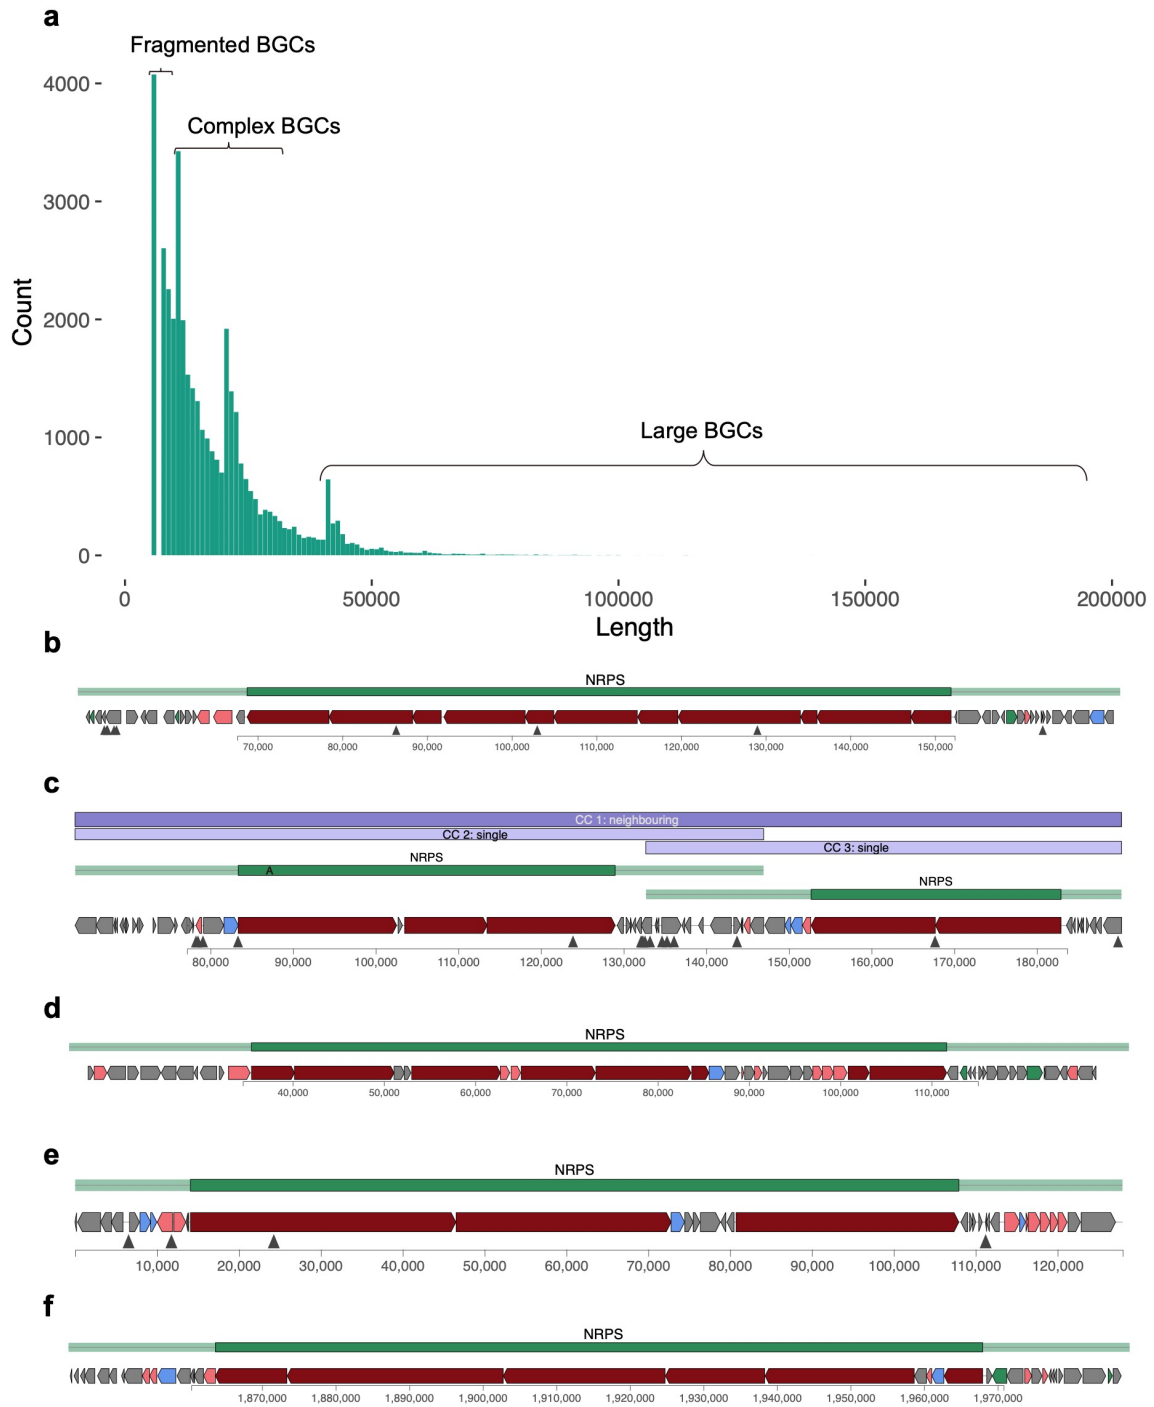

**Supplementary Fig. 4: Histogram of BGC sizes and the representative length BGCs. a,** Distribution of BGC length. The SMAG catalogue contains complex types of multigene BGCs, most of which were fragmented BGCs. **b-f,** Five NRPS clusters with a length >100kb.

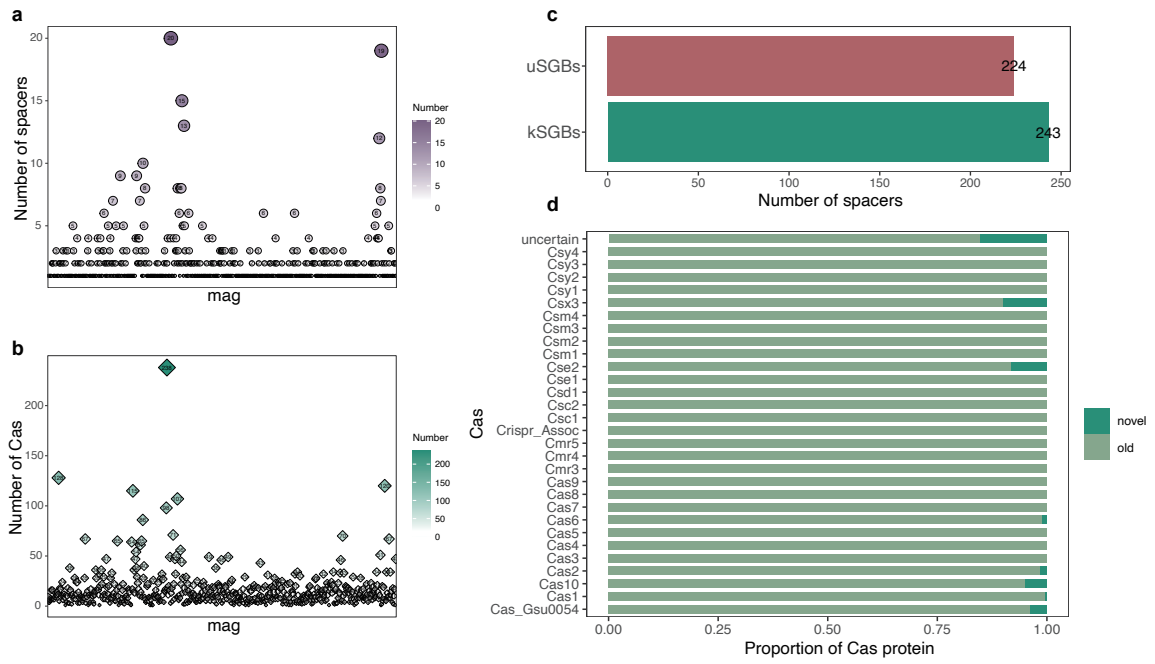

**Supplementary Fig. 5: Overview of the CRISPR and Cas proteins identified from the SMAG catalogue.** **a**, The number of spacers identified across the reconstructed MAGs (n = 662 MAGs). **b**, The comparison of identified spacers between uSGBs and kSGBs (n = 563 MAGs). **c**, The number of Cas proteins identified across the reconstructed MAGs. **d**, The Cas proteins were identified as novel and old Cas across Cas protein types.

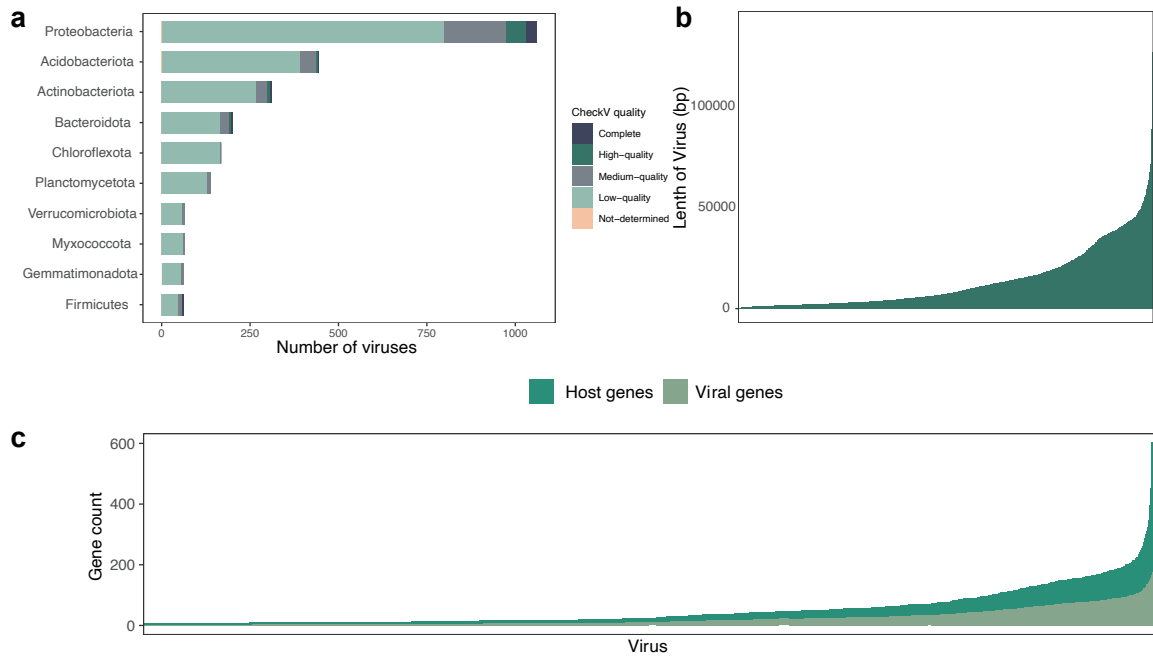

**Supplementary Fig. 6: Quality of virus and virus-host gene ratio.** **a**, The quality of the viruses identified across dominant phyla. **b**, The distribution of the viral length. **c**, The overview of virus and host gene ratio was identified from the SMAG.
